# Supplementary material
Source: PubMed Central journal article supplement (PMC1471831)
Supplement: cmaj_174_12_1737__1.pdf [file cmaj_174_12_1737__1.pdf]

**Appendix 1: Characteristics of trials included in the meta-analysis**

| Trial (year)                             | Patients |               | Key entry criteria                                 | Baseline blood pressure, mm Hg | Comparator                               |
|------------------------------------------|----------|---------------|----------------------------------------------------|--------------------------------|------------------------------------------|
|                                          | No.      | Mean age , yr |                                                    |                                |                                          |
| <b>Trials enrolling younger patients</b> |          |               |                                                    |                                |                                          |
| MRC <sup>21</sup> (1985)                 | 8700     | 52            | Hypertension                                       | 161/98                         | Diuretic                                 |
| MRC <sup>21</sup> (1985)                 | 13 057   | 52            | Hypertension                                       | 161/98                         | Placebo                                  |
| HAPPHY <sup>15</sup> (1988)              | 6569     | 52.2          | Hypertension                                       | 166/107                        | Diuretic                                 |
| CAPPP <sup>11</sup> (1999)               | 10 985   | 52.5          | Hypertension                                       | 160/99                         | ACE inhibitor                            |
| ELSA <sup>23</sup> (2002)                | 2334     | 56            | Hypertension                                       | 163/101                        | Calcium-channel blocker                  |
| UKPDS <sup>22</sup> (1998)               | 758      | 56.2          | Hypertension + diabetes                            | 159/93                         | ACE inhibitor                            |
| Yurenev et al <sup>32</sup> (1992)       | 304      | 45.5          | Hypertension + left ventricular hypertrophy        | 168/106                        | Diuretic                                 |
| VA COOP <sup>12</sup> (1982)             | 348      | 49.7          | Hypertension                                       | 147/101                        | Diuretic                                 |
| Berglund et al <sup>20</sup> (1986)      | 106      | 50            | Hypertension                                       | 170/105                        | Diuretic                                 |
| IPPPSH <sup>28</sup> (1985)              | 6357     | 52            | Hypertension                                       | 173/108                        | Placebo                                  |
| AASK <sup>13</sup> (2002)                | 1094     | 54.6          | Hypertension + hypertensive renal disease          | 150/96                         | Calcium-channel blocker or ACE inhibitor |
| <b>Trials enrolling older patients</b>   |          |               |                                                    |                                |                                          |
| NORDIL <sup>17</sup> (2000)              | 10 881   | 60.4          | Hypertension                                       | 174/106                        | Calcium-channel blocker                  |
| ASCOT-BPLA <sup>27</sup> (2005)          | 19 257   | 63            | Hypertension + 3 other cardiovascular risk factors | 164/95                         | Calcium-channel blocker                  |
| Dutch TIA <sup>29</sup> (2003)           | 1473     | 65            | TIA or non-disabling stroke                        | 158/91                         | Placebo                                  |
| CONVINCE <sup>18</sup> (2003)            | 16 476   | 65.6          | Hypertension + 1 other cardiovascular risk factor  | 150/87                         | Calcium-channel blocker                  |
| INVEST <sup>26</sup> (2003)              | 22 576   | 66.1          | Hypertension + coronary disease                    | 150/86                         | Calcium-channel blocker                  |
| LIFE <sup>25</sup> (2002)                | 9193     | 66.9          | Hypertension + left ventricular hypertrophy        | 174/98                         | Angiotensin-receptor blocker             |
| HEP <sup>30</sup> (1986)                 | 884      | 68.8          | Hypertension                                       | 196/99                         | No treatment                             |
| MRC-Old <sup>24</sup> (1992)             | 2183     | 70.3          | Hypertension                                       | 185/91                         | Diuretic                                 |
| MRC-Old <sup>24</sup> (1992)             | 3315     | 70.3          | Hypertension                                       | 185/91                         | Placebo                                  |
| TEST <sup>31</sup> (1995)                | 720      | 70.4          | Hypertension + TIA or stroke                       | 161/89                         | Placebo                                  |
| STOP <sup>19</sup> (1991)                | 1627     | 75.7          | Hypertension                                       | 195/102                        | Placebo                                  |
| STOP2 <sup>16</sup> (1999)               | 6614     | 76            | Hypertension                                       | 194/98                         | ACE inhibitor or calcium-channel blocker |

Note: TIA = transient ischemic attack, ACE = angiotensin-converting enzyme, MRC = Medical Research Council study, HAPPHY = Heart Attack Primary Prevention in Hypertension study, CAPPP = Captopril Prevention Project, ELSA = European Lacidipine Study on Atherosclerosis, UKPDS = UK Prospective Diabetes Study, VA COOP = Veterans Administration Cooperative Study, IPPPSH = International Prospective Primary Prevention Study in Hypertension, AASK = African American Study of Kidney disease and hypertension, NORDIL = Nordic Diltiazem study, ASCOT-BPLA = Anglo-Scandinavian Cardiac Outcomes Trial-Blood Pressure Lowering Arm, CONVINCE = Controlled Onset Verapamil Investigation of Cardiovascular End points trial, INVEST = International Verapamil-Trandolapril study, LIFE = Losartan Intervention For Endpoint reduction in hypertension study, HEP = Hypertension in Elderly Patients trial, TEST= Tenormin after Stroke and TIA, STOP = Swedish Trial in Old Patients with hypertension.
