# Supplementary material
Source: PubMed Central journal article supplement (PMC1471831)

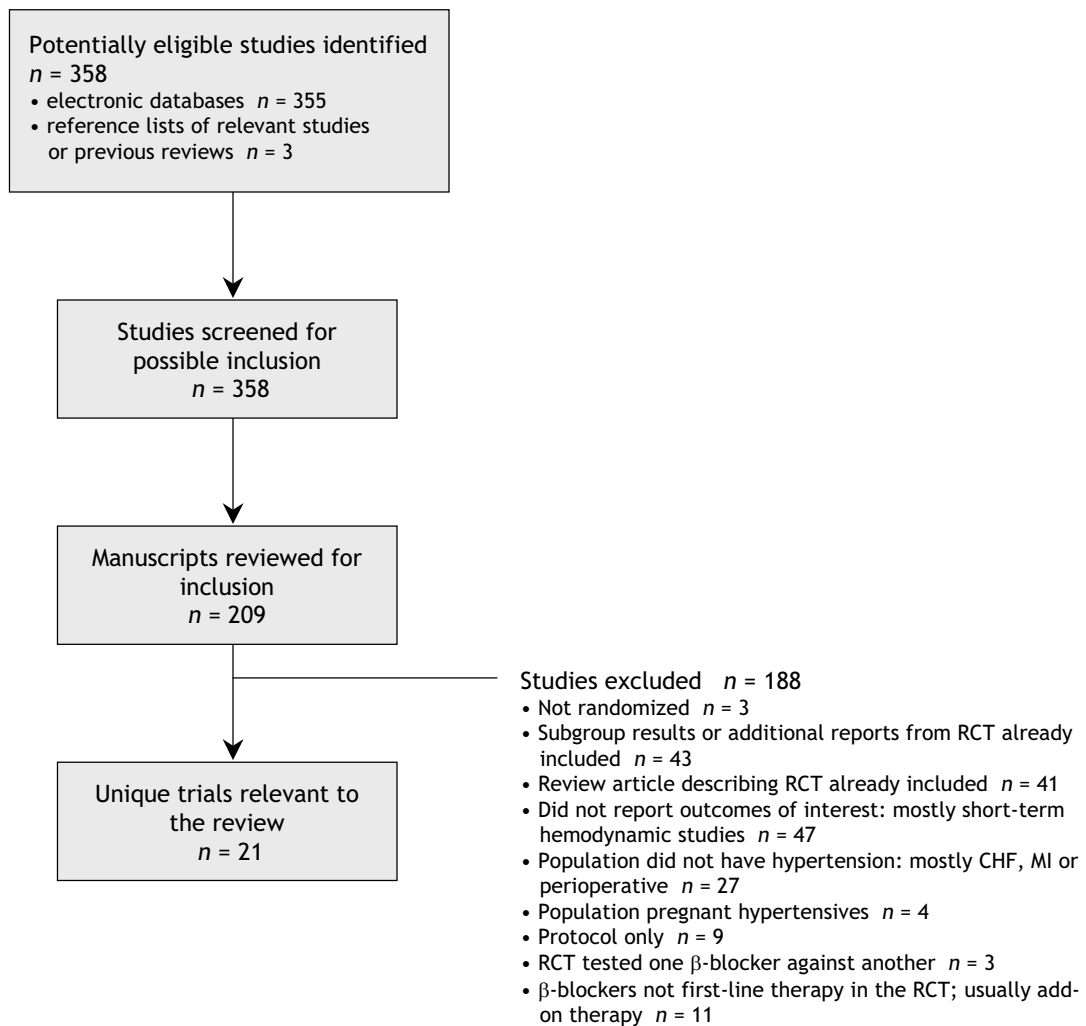

## Appendix 2: Flow of trials through the selection process.

Supplement: cmaj_174_12_1737_v2_1.pdf [file cmaj_174_12_1737_v2_1.pdf]
